# Supplementary material
Source: Research Square preprint supplement (doi:10.21203/rs.3.rs-9627794/v1)
Supplement: Supplementary file 1 [file 4c218d453a2900e312830e5f.docx]

Table 1. Soil physical properties at different radial distances from Terminalia brownii trunk and soil depths (mean ± SE)

Parameter Depth(cm) 1.5m from trunk Crown edge Open field(15m) Depth mean

Sand(%) 0-15 26.0 ± 2.45 25.6 ± 3.84 24.8 ± 3.35 25.47 a

15-30 26.8 ± 2.68 24.8 ± 5.40 21.2 ± 4.15 24.27 a

Distance mean 26.4 A 25.2 AB 23.0 B

Clay(%) 0-15 40.4 ± 2.60 42.8 ± 3.03 45.6 ± 3.29 42.93 a

15-30 39.6 ± 3.29 44.8 ± 9.96 52.8 ± 5.76 45.73 a

Distance mean 40.0 B 43.8 AB 49.2 A

Silt(%) 0-15 33.6 ± 1.67 31.6 ± 2.61 29.6 ± 1.67 31.60 a

15-30 33.6 ± 0.89 30.4 ± 5.90 26.0 ± 3.46 30.00 a

Distance mean 33.6 A 31.0 AB 27.8 B

Bulk density 0-15 1.07 ± 0.07 1.14 ± 0.07 1.20 ± 0.06 1.14 a

(g/cm³) 15-30 1.15 ± 0.19 1.17 ± 0.06 1.22 ± 0.07 1.18 a

Distance mean 1.11 B 1.16 AB 1.21 A

Moisture(%) 0-15 20.94 ± 1.07 20.89 ± 2.03 19.72 ± 1.79 20.52 b

15-30 23.27 ± 2.56 23.22 ± 2.04 22.77 ± 1.22 23.09 a

Distance mean 22.10 A 22.06 A 21.24 A

Note: Means followed by different lowercase letters in the same column differ significantly (P < 0.05) between depths. Means followed by different uppercase letters in the same row differ significantly (P < 0.05) among distances.

Table 2. Soil chemical properties at different radial distances from Terminalia brownii trunk and soil depths (mean ± SE)

Parameter Depth(cm) 1.5m from trunk Crown edge Open field(15m) Depth mean

Available P (ppm) 0-15 12.28 ± 1.99 10.75 ± 2.06 5.31 ± 1.23 9.45 a

15-30 7.54 ± 0.74 6.32 ± 1.06 3.93 ± 0.44 5.93 b

Distance mean 9.91 A 8.54 B 4.63 C

Total N (%) 0-15 0.17 ± 0.06 0.15 ± 0.06 0.10 ± 0.04 0.14 a

15-30 0.14 ± 0.07 0.11 ± 0.05 0.08 ± 0.05 0.11 b

Distance mean 0.15 A 0.13 B 0.09 C

Organic C (%) 0-15 1.93 ± 0.70 1.77 ± 0.73 1.18 ± 0.48 1.63 a

15-30 1.63 ± 0.85 1.34 ± 0.71 0.93 ± 0.55 1.31 b

Distance mean 1.78 A 1.57 A 1.06 B

Organic Matter (%) 0-15 3.15 ± 1.52 2.96 ± 1.37 2.36 ± 0.66 2.82 a

15-30 2.72 ± 1.47 2.08 ± 1.22 1.43 ± 0.91 2.07 b

Distance mean 2.93 A 2.52 A 1.90 B

Exchangeable K (mg/kg) 0-15 242.6 ± 33.6 220.4 ± 16.8 157.5 ± 11.7 206.8 a

15-30 203.4 ± 45.1 186.7 ± 36.4 144.9 ± 25.5 178.3 b

Distance mean 223.0 A 203.6 A 151.2 B

CEC (cmol(+) kg⁻¹) 0-15 38.97 ± 2.11 35.3 ± 2.18 31.88 ± 2.63 35.38 a

15-30 34.59 ± 2.5 32.05 ± 2.1 26.05 ± 0.98 30.89 b

Distance mean 36.78 A 33.68 B 28.96 C

pH (1:2.5 H₂O) 0-15 6.34 ± 0.19 6.11 ± 0.32 5.66 ± 0.17 6.04 a

15-30 5.97 ± 0.17 5.85 ± 0.16 5.50 ± 0.16 5.77 b

Distance mean 6.17 A 5.98 B 5.58 C

Note: Means followed by different lowercase letters in the same column differ significantly (P < 0.05) between depths. Means followed by different uppercase letters in the same row differ significantly (P < 0.05) among distances.

Table 3. Teff grain and biomass yields at different radial distances from Terminalia brownii trunk (kg/ha, mean ± SE)

Yield parameter 1.5 m from trunk Crown edge Open field (15 m)

Grain yield 1317.1 ± 15.2 B 1353.4 ± 18.5 A 1309.2 ± 14.8 B

Biomass yield 4986.4 ± 52.3 B 5145.2 ± 61.7 A 4972.0 ± 49.6 B

Note: Means followed by different uppercase letters in the same row differ significantly (P < 0.05).
